# Supplementary material
Source: MDPI journal article supplement (https://www.mdpi.com/2071-1050/14/12/7322)
Supplement: s1 [file s1]

## Metadata Report For:

Location: Ado-Ekiti, Ekiti, Nigeria

Project: BIODIVERSITY CONSERVATION OF KAINJI PARK, Series: NJFU PAPER, Year: 2021

Generated: 10/11/2021

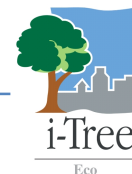

### i-Tree Eco v6.0.23

Project created: 10/9/2021

Project file location: C:\Users\MR ADESHINA\Desktop\NJFU PAPER.ieco

Model HAS been run

Project Type: Plot-based

- Project: BIODIVERSITY CONSERVATION OF KAINJI PARK
- Series: NJFU PAPER
- Year: 2021
- 1/24 plots completed
- 15 trees

Project Info:

- Location:
  - Nation: Nigeria
  - State: Ekiti
  - City: Ado-Ekiti
- Leaf on day (day of year, 1 - 365, when frost ends): 0
- Leaf off day (day of year, 1 - 365, when frost begins): 365
- Frost-free days: 365
- Longitude: 5.256958
- Latitude: 7.611296
- Elevation: 457.2 (m)
- Area: 1,520,177.00 hectares
- Population: 430,000
- Study area is treated as Urban: Yes
- Tropical climate equations used: Yes
- Units: Metric

Pollution Details:

- Year: -1

| CO | O3 | NO2 | SO2 | PM2.5 | Location | Station ID | Distance (km) |
|----|----|-----|-----|-------|----------|------------|---------------|
|----|----|-----|-----|-------|----------|------------|---------------|

Weather Station Details:

- Year: 2018
- USAF: 651010
- WBAN: 99999
- Name: ILORIN
- Data source: NCDC

\* see avoided runoff report for annual precipitation total used for analysis

Benefit Prices:

## Metadata Report For:

Location: Ado-Ekiti, Ekiti, Nigeria

Project: BIODIVERSITY CONSERVATION OF KAINJI PARK, Series: NJFU PAPER, Year: 2021

Generated: 10/11/2021



- Electricity ₦ (NGN)/kWh: 0.00 (Eco default value: -1.00 for -1)

### Models:

- Forecast v6.0.23
- UFORE-D v1.1.0

### Processing History:

| Date/Time                          | File Name                                             | Retrieved |
|------------------------------------|-------------------------------------------------------|-----------|
| Saturday, October 9, 2021 12:52 PM | _089_01_001_00000_NJFU_PAPER.ieco.2021_10_9_46313.zip | Yes       |

## Report Availability

|                                                                                        |
|----------------------------------------------------------------------------------------|
| Formatted Reports                                                                      |
| Written Report                                                                         |
| Composition and Structure                                                              |
| Structure Summary                                                                      |
| By Species                                                                             |
| By Stratum and Species                                                                 |
| Population Summary                                                                     |
| By Species                                                                             |
| By Stratum                                                                             |
| By Stratum per Unit Area                                                               |
| Public and Private by Stratum (Unavailable: "Public/private" not checked)              |
| Street Trees by Stratum (Unavailable: "Street tree/non-street tree" not checked)       |
| Species Distribution                                                                   |
| By DBH Class (chart)                                                                   |
| By DBH Class (vertical table)                                                          |
| By DBH Class (horizontal table)                                                        |
| By DBH Class and Stratum (vertical table)                                              |
| By DBH Class and Stratum (horizontal table)                                            |
| Importance Values                                                                      |
| By Species                                                                             |
| Diversity Indices                                                                      |
| By Stratum                                                                             |
| Species Range                                                                          |
| Native Status by Stratum                                                               |
| Condition                                                                              |
| By Species                                                                             |
| By Stratum and Species                                                                 |
| Crown Health                                                                           |
| By Species                                                                             |
| By Stratum and Species                                                                 |
| Leaf Area                                                                              |
| By Stratum                                                                             |
| By Stratum per Unit Area                                                               |
| Leaf Area and Biomass                                                                  |
| Of Shrubs by Stratum (Unavailable: "Percent shrub cover", "Shrub details" not checked) |
| Of Trees and Shrubs by Stratum                                                         |

# Metadata Report For:

Location: Ado-Ekiti, Ekiti, Nigeria

Project: BIODIVERSITY CONSERVATION OF KAINJI PARK, Series: NJFU PAPER, Year: 2021

Generated: 10/11/2021

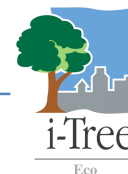

|                                                                                                                 |
|-----------------------------------------------------------------------------------------------------------------|
| Ground Cover Composition (Unavailable: "Ground cover" not checked)                                              |
| By Stratum (Unavailable: "Ground cover" not checked)                                                            |
| Land Use Composition                                                                                            |
| By Stratum                                                                                                      |
| Relative Performance Index                                                                                      |
| By Species                                                                                                      |
| Maintenance (Unavailable: "" not checked)                                                                       |
| Recommended (Unavailable: "Maintenance recommended" not checked)                                                |
| Recommended by Species (Unavailable: "Maintenance recommended" not checked)                                     |
| Recommended by Species and DBH (Unavailable: "Maintenance recommended" not checked)                             |
| Task (Unavailable: "Maintenance task" not checked)                                                              |
| Task by Species (Unavailable: "Maintenance task" not checked)                                                   |
| Task by Species and DBH (Unavailable: "Maintenance task" not checked)                                           |
| Sidewalk Conflicts (Unavailable: "Sidewalk conflict" not checked)                                               |
| Sidewalk Conflicts by Species (Unavailable: "Sidewalk conflict" not checked)                                    |
| Sidewalk Conflicts by Species and DBH (Unavailable: "Sidewalk conflict" not checked)                            |
| Utility Conflicts (Unavailable: "Utility conflict" not checked)                                                 |
| Utility Conflicts by Species (Unavailable: "Utility conflict" not checked)                                      |
| Utility Conflicts by Species and DBH (Unavailable: "Utility conflict" not checked)                              |
| Other (Unavailable: "Custom Field One name:", "Custom Field Two name:", "Custom Field Three name:" not checked) |
| Field One (Unavailable: "Custom Field One name:" not checked)                                                   |
| Field One by Species (Unavailable: "Custom Field One name:" not checked)                                        |
| Field One by Species and DBH (Unavailable: "Custom Field One name:" not checked)                                |
| Field Two (Unavailable: "Custom Field Two name:" not checked)                                                   |
| Field Two by Species (Unavailable: "Custom Field Two name:" not checked)                                        |
| Field Two by Species and DBH (Unavailable: "Custom Field Two name:" not checked)                                |
| Field Three (Unavailable: "Custom Field Three name:" not checked)                                               |
| Field Three by Species (Unavailable: "Custom Field Three name:" not checked)                                    |
| Field Three by Species and DBH (Unavailable: "Custom Field Three name:" not checked)                            |
| Benefits and Costs                                                                                              |
| Benefits Summary of Trees                                                                                       |
| By Species                                                                                                      |
| By Stratum and Species                                                                                          |
| Carbon Storage of Trees                                                                                         |
| By Species                                                                                                      |
| By Stratum                                                                                                      |
| By Stratum per Unit Area                                                                                        |
| Annual Carbon Sequestration of Trees                                                                            |
| By Species                                                                                                      |
| By Stratum                                                                                                      |
| By Stratum per Unit Area                                                                                        |
| Annual Net Carbon Sequestration of Trees                                                                        |
| By Species                                                                                                      |
| By Stratum                                                                                                      |
| By Stratum Per Unit Area                                                                                        |
| Energy Effects (Unavailable: "Energy (building interactions)" not checked)                                      |
| Of Trees (Unavailable: "Energy (building interactions)" not checked)                                            |
| Hydrology Effects of Trees                                                                                      |
| By Species                                                                                                      |

# Metadata Report For:

Location: Ado-Ekiti, Ekiti, Nigeria

Project: BIODIVERSITY CONSERVATION OF KAINJI PARK, Series: NJFU PAPER, Year: 2021

Generated: 10/11/2021



|                                                                                       |
|---------------------------------------------------------------------------------------|
| By Stratum                                                                            |
| Oxygen Production of Trees                                                            |
| By Stratum                                                                            |
| By Stratum per Unit Area                                                              |
| Pollution Removal by Trees and Shrubs (Unavailable for this project type or location) |
| Monthly Removal (Unavailable for this project type or location)                       |
| Monthly Removal (chart display) (Unavailable for this project type or location)       |
| Pollution Removal by Grass/Herbaceous (Unavailable for this project type or location) |
| Monthly Removal (Unavailable for this project type or location)                       |
| Monthly Removal (chart display) (Unavailable for this project type or location)       |
| VOC Emissions of Trees                                                                |
| By Species                                                                            |
| By Stratum                                                                            |
| UV Effects of Trees (Unavailable for this project type or location)                   |
| By Stratum (Unavailable for this project type or location)                            |
| Avian Habitat Suitability (Unavailable for this project type or location)             |
| By Plot (Unavailable for this project type or location)                               |
| By Stratum (Unavailable for this project type or location)                            |
| Management Costs                                                                      |
| By Expenditure                                                                        |
| Net Annual Benefits                                                                   |
| Net Annual Benefits for All Trees                                                     |
| Foodscape Benefits of Trees                                                           |
| By Species                                                                            |
| Leaf Nutrients of Trees                                                               |
| By Species                                                                            |
| Individual Level Results                                                              |
| Composition and Structure                                                             |
| Of Plots                                                                              |
| Of Trees                                                                              |
| Of Trees By Species                                                                   |
| Of Trees By Stratum                                                                   |
| Tree Benefits and Costs                                                               |
| Summary                                                                               |
| Carbon Storage                                                                        |
| Carbon Sequestration                                                                  |
| Energy Effects (Unavailable: "Energy (building interactions)" not checked)            |
| Energy Avoided Pollutants (Unavailable: "Energy (building interactions)" not checked) |
| Hydrology Effects                                                                     |
| Pollution Removal                                                                     |
| Oxygen Production                                                                     |
| VOC Emissions                                                                         |
| Miscellaneous                                                                         |
| Plot Comments                                                                         |
| Tree Comments                                                                         |
| Shrub Comments                                                                        |
| Air Quality Health Impacts and Values (Unavailable for this project type or location) |
| By Trees (Unavailable for this project type or location)                              |
| By Shrubs (Unavailable for this project type or location)                             |

# Metadata Report For:

Location: Ado-Ekiti, Ekiti, Nigeria

Project: BIODIVERSITY CONSERVATION OF KAINJI PARK, Series: NJFU PAPER, Year: 2021

Generated: 10/11/2021



|                                                                                     |
|-------------------------------------------------------------------------------------|
| By Grass/Herbaceous (Unavailable for this project type or location)                 |
| Summary (Unavailable for this project type or location)                             |
| Pest Analysis                                                                       |
| Susceptibility to Pests                                                             |
| By Stratum                                                                          |
| Primary Pest (Unavailable: "Pests (IPED)" not checked)                              |
| Impacts by Stratum (Unavailable: "Pests (IPED)" not checked)                        |
| Impacted Tree Details (Unavailable: "Pests (IPED)" not checked)                     |
| Signs and Symptoms (Unavailable: "Pests (IPED)" not checked)                        |
| Totals by Species (Unavailable: "Pests (IPED)" not checked)                         |
| Summaries by Species (Unavailable: "Pests (IPED)" not checked)                      |
| Details by Species (Unavailable: "Pests (IPED)" not checked)                        |
| Totals by Stratum (Unavailable: "Pests (IPED)" not checked)                         |
| Summaries by Stratum (Unavailable: "Pests (IPED)" not checked)                      |
| Details by Stratum (Unavailable: "Pests (IPED)" not checked)                        |
| Impacted Tree Finder (Unavailable: "Pests (IPED)" not checked)                      |
| Pest Review (Unavailable: "Pests (IPED)" not checked)                               |
| Of Assessed Trees (Unavailable: "Pests (IPED)" not checked)                         |
| Charts                                                                              |
| Pollution and Weather                                                               |
| Raw and Source Data                                                                 |
| Air Pollutant Concentration (Unavailable for this project type or location)         |
| Photosynthetically Active Radiation                                                 |
| Rain                                                                                |
| Temperature                                                                         |
| UV Index (Unavailable for this project type or location)                            |
| Air Quality Improvement (Unavailable for this project type or location)             |
| By Trees (Unavailable for this project type or location)                            |
| By Shrubs (Unavailable: "Percent shrub cover", "Shrub details" not checked)         |
| By Grass/Herbaceous (Unavailable for this project type or location)                 |
| Air Pollutant Flux (Dry Deposition) (Unavailable for this project type or location) |
| Per Unit Tree Cover (Unavailable for this project type or location)                 |
| Per Unit Shrub Cover (Unavailable for this project type or location)                |
| Per Unit Grass/Herbaceous Cover (Unavailable for this project type or location)     |
| Transpiration                                                                       |
| By Trees                                                                            |
| By Shrubs (Unavailable: "Percent shrub cover", "Shrub details" not checked)         |
| Evaporation                                                                         |
| By Trees                                                                            |
| By Shrubs (Unavailable: "Percent shrub cover", "Shrub details" not checked)         |
| Water Intercepted                                                                   |
| By Trees                                                                            |
| By Shrubs (Unavailable: "Percent shrub cover", "Shrub details" not checked)         |
| Avoided Runoff                                                                      |
| By Trees                                                                            |
| By Shrubs (Unavailable: "Percent shrub cover", "Shrub details" not checked)         |
| Potential Evapotranspiration                                                        |
| By Trees                                                                            |
| By Shrubs (Unavailable: "Percent shrub cover", "Shrub details" not checked)         |

# Metadata Report For:

Location: Ado-Ekiti, Ekiti, Nigeria

Project: BIODIVERSITY CONSERVATION OF KAINJI PARK, Series: NJFU PAPER, Year: 2021

Generated: 10/11/2021



|                                                                             |
|-----------------------------------------------------------------------------|
| UV Index Reduction by Trees (Unavailable for this project type or location) |
| Effects in Tree Shade (Unavailable for this project type or location)       |
| Effects Overall (Unavailable for this project type or location)             |
| Isoprene                                                                    |
| By Trees                                                                    |
| By Shrubs (Unavailable: "Percent shrub cover", "Shrub details" not checked) |
| Monoterpene                                                                 |
| By Trees                                                                    |
| By Shrubs (Unavailable: "Percent shrub cover", "Shrub details" not checked) |
| Forecast Reports                                                            |
| Composition and Structure                                                   |
| Population Summary                                                          |
| Number of Trees                                                             |
| Number of Trees by Stratum                                                  |
| Percent Tree Cover                                                          |
| Percent Tree Cover by Stratum                                               |
| Tree Cover Area                                                             |
| Tree Cover Area by Stratum                                                  |
| Average DBH Growth                                                          |
| Average DBH Growth by Stratum                                               |
| Yearly DBH Distributions                                                    |
| Basal Area                                                                  |
| Basal Area by Stratum                                                       |
| Leaf Area and Biomass                                                       |
| Leaf Area                                                                   |
| Leaf Area by Stratum                                                        |
| Leaf Area Index                                                             |
| Leaf Area Index by Stratum                                                  |
| Leaf Biomass                                                                |
| Leaf Biomass by Stratum                                                     |
| Leaf Biomass per Unit Area                                                  |
| Leaf Biomass by Stratum per Unit Area                                       |
| Tree Biomass                                                                |
| Tree Biomass by Stratum                                                     |
| Benefits                                                                    |
| Carbon Storage and Sequestration                                            |
| Carbon Storage                                                              |
| Carbon Storage by Stratum                                                   |
| Carbon Sequestration                                                        |
| Carbon Sequestration by Stratum                                             |
| Pollutant Removal by Trees (Unavailable for this project type or location)  |
| Value for All Pollutants (Unavailable for this project type or location)    |
| CO (Unavailable for this project type or location)                          |
| NO2 (Unavailable for this project type or location)                         |
| O3 (Unavailable for this project type or location)                          |
| SO2 (Unavailable for this project type or location)                         |
| PM2.5 (Unavailable for this project type or location)                       |
